# Supplementary material for: Unraveling the interactions of reductants and reaction path over Cu-ZSM-5 for model coal-gas-SCRviaa transient reaction study
Source: Royal Society of Chemistry journal article supplement (doi:10.1039/d1cy01810h), 2021-12-15
Supplement: d1cy01810h1.pdf [file d1cy01810h1.pdf]

## Supporting Information

### **Unraveling the interactions of reductants and reaction path over Cu-ZSM-5 for model coal-gas-SCR via transient reaction study**

*Jie Cheng, Ruinian Xu\*, Ning Liu, Chengna Dai, Gangqiang Yu, Ning Wang and*

*Biaohua Chen*

Faculty of Environment and Life, Beijing University of Technology, Beijing 100124,

China

\*Corresponding Authors: Ruinian Xu

xuruinian@bjut.edu.cn (R. Xu)

## S1. XRD results

## S2. TPD results

## S3. TPSR results

## S4. *In situ* DRIFTS results

**Fig. S1.** XRD spectra of Cu based catalyst with different topology structure.

**Fig. S2.** H<sub>2</sub> signal (a), CO signal (b), CH<sub>4</sub> signal (c) of Cu-ZSM-5 catalyst at different adsorption conditions.

**Fig. S3.** MS signals of Cu-ZSM-5 catalyst at different reaction conditions.

**Fig. S4.** *In situ* DRIFTS spectra of (a) H<sub>2</sub>, (b) CO, (c) CH<sub>4</sub>, (d) CO + H<sub>2</sub>, (e) CH<sub>4</sub> + H<sub>2</sub>, (f) CH<sub>4</sub> + CO, and (g) CH<sub>4</sub> + CO + H<sub>2</sub> reacted with pre-adsorbed NO + O<sub>2</sub> on Cu-ZSM-5 catalyst at 250°C as a function of time.

**Fig. S5.** *In situ* DRIFTS spectra of (a) NO + H<sub>2</sub> + O<sub>2</sub>, (b) NO + CO + O<sub>2</sub>, (c) NO + CH<sub>4</sub> + O<sub>2</sub>, (d) NO + CO + H<sub>2</sub> + O<sub>2</sub>, (e) NO + CH<sub>4</sub> + H<sub>2</sub> + O<sub>2</sub>, (f) NO + CH<sub>4</sub> + CO + O<sub>2</sub> and (g) NO + CH<sub>4</sub> + CO + H<sub>2</sub> + O<sub>2</sub> on Cu-ZSM-5 catalyst at 250 °C as a function of time.

**Fig. S6.** *In situ* DRIFTS spectra of (a) NO + CO + H<sub>2</sub> + O<sub>2</sub>, (b) stop CO + H<sub>2</sub>, (c) NO + CH<sub>4</sub> + H<sub>2</sub> + O<sub>2</sub>, (d) stop CH<sub>4</sub> + H<sub>2</sub>, (e) NO + CH<sub>4</sub> + CO + O<sub>2</sub>, (f) stop CH<sub>4</sub> + CO (e) NO + CH<sub>4</sub> + CO + H<sub>2</sub> + O<sub>2</sub> and (f) stop CH<sub>4</sub> + CO + H<sub>2</sub> on Cu-ZSM-5 catalyst at 250 °C as a function of time.

**Fig. S7.** *In situ* DRIFTS spectra in the range of 2400-2000 cm<sup>-1</sup> (a) stop H<sub>2</sub>, (b) stop CO, (c) stop CH<sub>4</sub>, (d) stop CO + H<sub>2</sub>, (e) stop CH<sub>4</sub> + H<sub>2</sub>, (f) stop CH<sub>4</sub> + CO and (g) stop CH<sub>4</sub> + CO + H<sub>2</sub> on Cu-ZSM-5 catalyst at 250 °C as a function of time.

**Fig. S8.** *In situ* DRIFTS spectra of (a) NO + H<sub>2</sub> + O<sub>2</sub>, (b) stop H<sub>2</sub>, (c) NO + CO + O<sub>2</sub>, (d) stop CO, (e) NO + CH<sub>4</sub> + O<sub>2</sub> and (f) stop CH<sub>4</sub> on Cu-ZSM-5 catalyst at 250 °C as a function of time.

**Fig. S9.** *In situ* DRIFTS spectra on Cu-ZSM-5 catalyst at 250 °C under different reaction condition.

**Fig. S10.** *In situ* DRIFTS spectra on Cu-ZSM-5 catalyst at 350 °C under different reaction condition.

**Table S1.** Observed species in the reaction process as identified by IR.

**Table S2.** Reaction steps of various SCR reactions.

## S1. XRD results

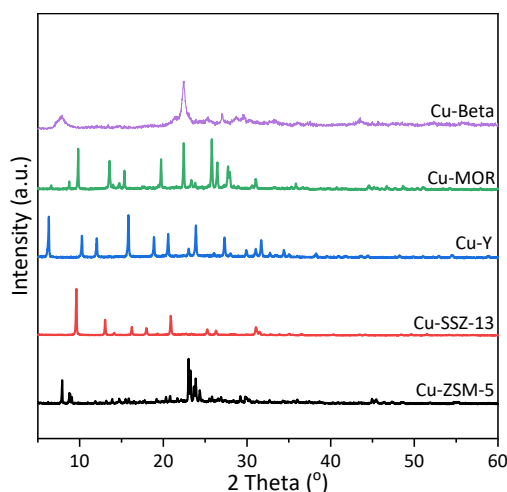

**Fig. S1.** XRD spectra of Cu based catalyst with different topology structure.

As shown in **Fig. S1**, five kinds of zeolite catalyst with different topology structure exhibit complete diffraction peak according to the database of IZA<sup>1</sup>, which indicated that the modification process did not deteriorate zeolite structure. In addition, the characteristic signals of CuO species ( $2\theta=35.5$  and  $38.8^\circ$ ) are not observed in all patterns, suggesting that CuO species were highly dispersed on the zeolite.

## S2. TPD results

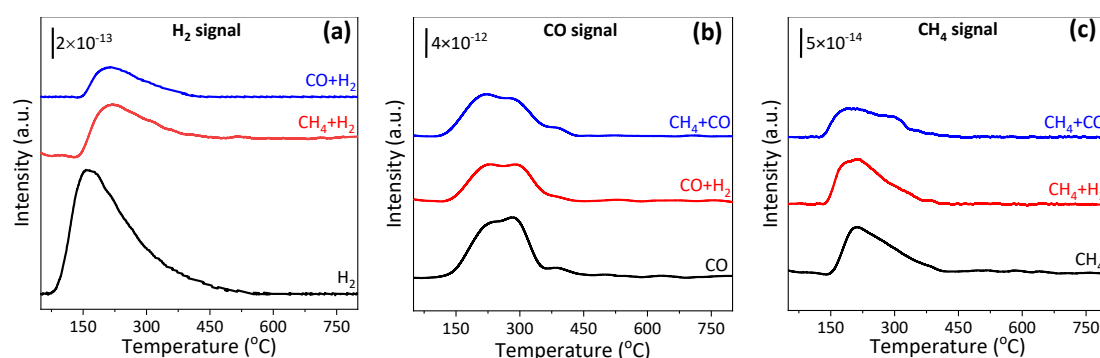

**Fig. S2.** H<sub>2</sub> signal (a), CO signal (b), CH<sub>4</sub> signal (c) of Cu-ZSM-5 catalyst at different adsorption conditions.

In order to explore the competitive adsorption between reductants, the H<sub>2</sub>, CO,

and CH<sub>4</sub> signal at different adsorption conditions were monitored. As shown in **Fig. S2**, after introducing CO + H<sub>2</sub> and CH<sub>4</sub> + H<sub>2</sub> for co-adsorption, the intensity of H<sub>2</sub> signal greatly decreased, which indicated that CO and CH<sub>4</sub> were regarded as an inhibitor for the H<sub>2</sub> adsorption. Moreover, the H<sub>2</sub> signal in the flow of CO + H<sub>2</sub> is weaker than that of CH<sub>4</sub> + H<sub>2</sub>, indicating that the inhibition effect of CO is stronger than CH<sub>4</sub> which may be due to the strong adsorption ability of CO. As for CO and CH<sub>4</sub> adsorption, the introduction of external reducing agent has little effect on its adsorption.

### S3. TPSR results

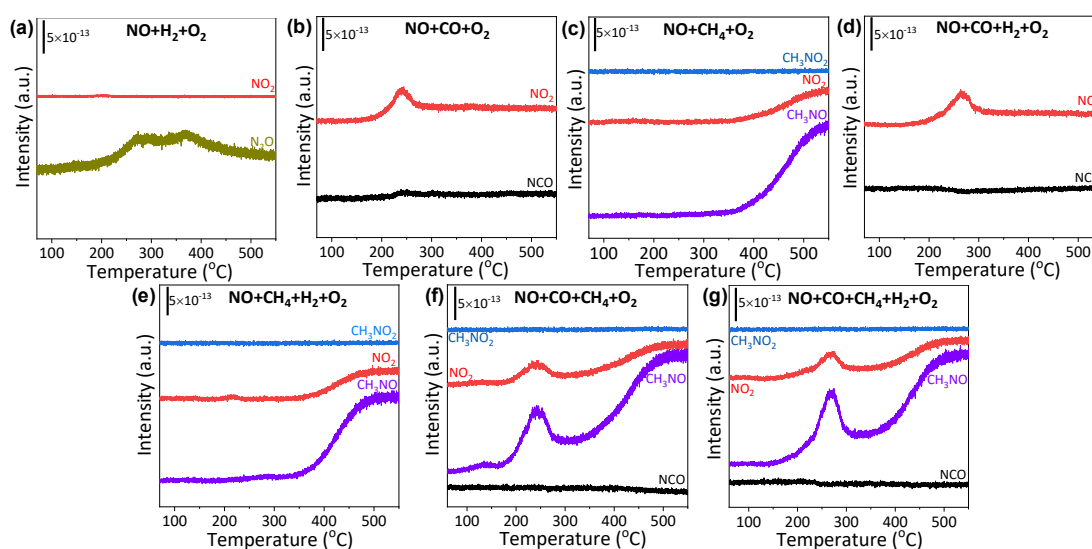

**Fig. S3.** MS signals of Cu-ZSM-5 catalyst at different reaction conditions.

### S4. *In situ* DRIFTS results

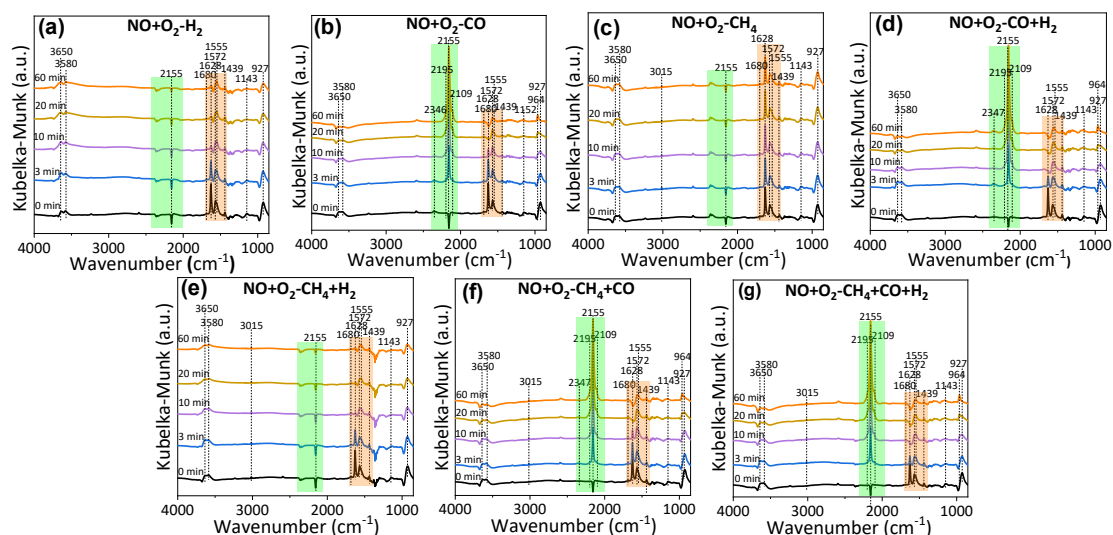

**Fig. S4.** *In situ* DRIFTS spectra of (a) H<sub>2</sub>, (b) CO, (c) CH<sub>4</sub>, (d) CO + H<sub>2</sub>, (e) CH<sub>4</sub> + H<sub>2</sub>, (f) CH<sub>4</sub> + CO, and (g) CH<sub>4</sub> + CO + H<sub>2</sub> reacted with pre-adsorbed NO + O<sub>2</sub> on Cu-ZSM-5 catalyst at 250 °C as a function of time.

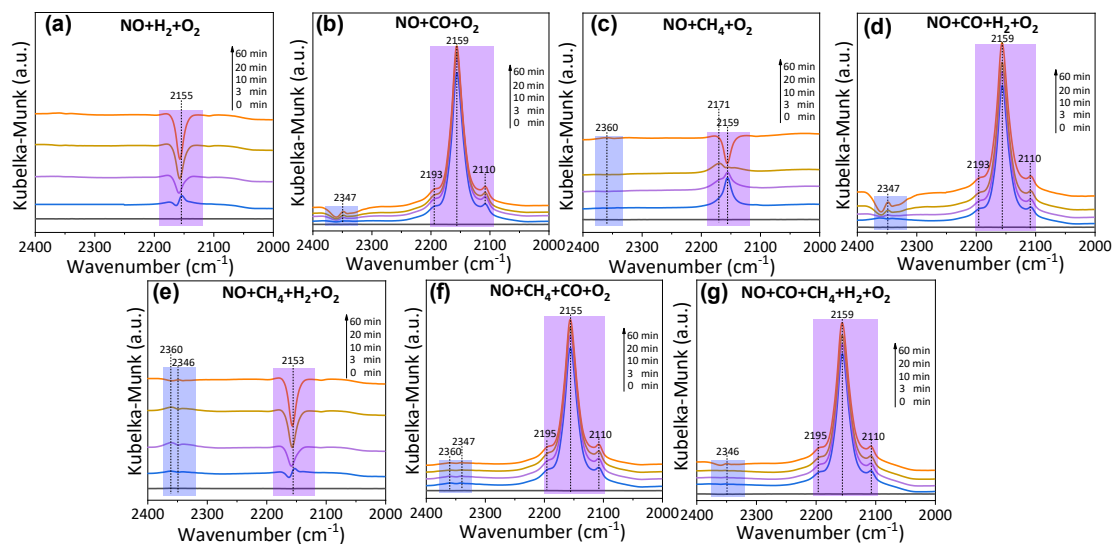

**Fig. S5.** *In situ* DRIFTS spectra of (a) NO + H<sub>2</sub> + O<sub>2</sub>, (b) NO + CO + O<sub>2</sub>, (c) NO + CH<sub>4</sub> + O<sub>2</sub>, (d) NO + CO + H<sub>2</sub> + O<sub>2</sub>, (e) NO + CH<sub>4</sub> + H<sub>2</sub> + O<sub>2</sub>, (f) NO + CH<sub>4</sub> + CO + O<sub>2</sub> and (g) NO + CH<sub>4</sub> + CO + H<sub>2</sub> + O<sub>2</sub> on Cu-ZSM-5 catalyst at 250 °C as a function of time.

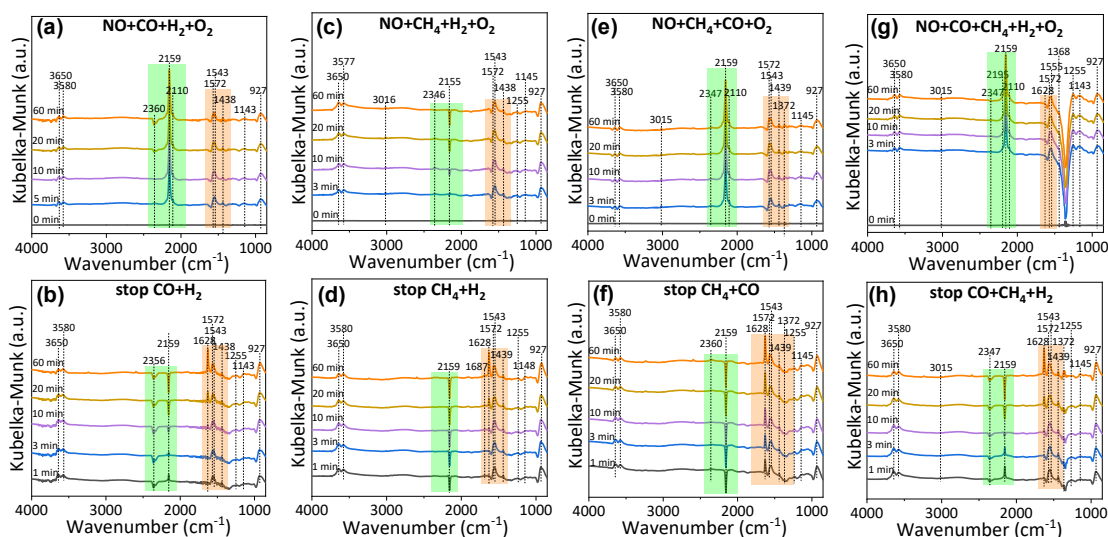

**Fig. S6.** *In situ* DRIFTS spectra of (a) NO + CO + H<sub>2</sub> + O<sub>2</sub>, (b) stop CO + H<sub>2</sub>, (c) NO + CH<sub>4</sub> + H<sub>2</sub> + O<sub>2</sub>, (d) stop CH<sub>4</sub> + H<sub>2</sub>, (e) NO + CH<sub>4</sub> + CO + O<sub>2</sub>, (f) stop CH<sub>4</sub> + CO (e) NO + CH<sub>4</sub> + CO + H<sub>2</sub> + O<sub>2</sub> and (f) stop CH<sub>4</sub> + CO + H<sub>2</sub> on Cu-ZSM-5 catalyst at 250 °C as a function of time.

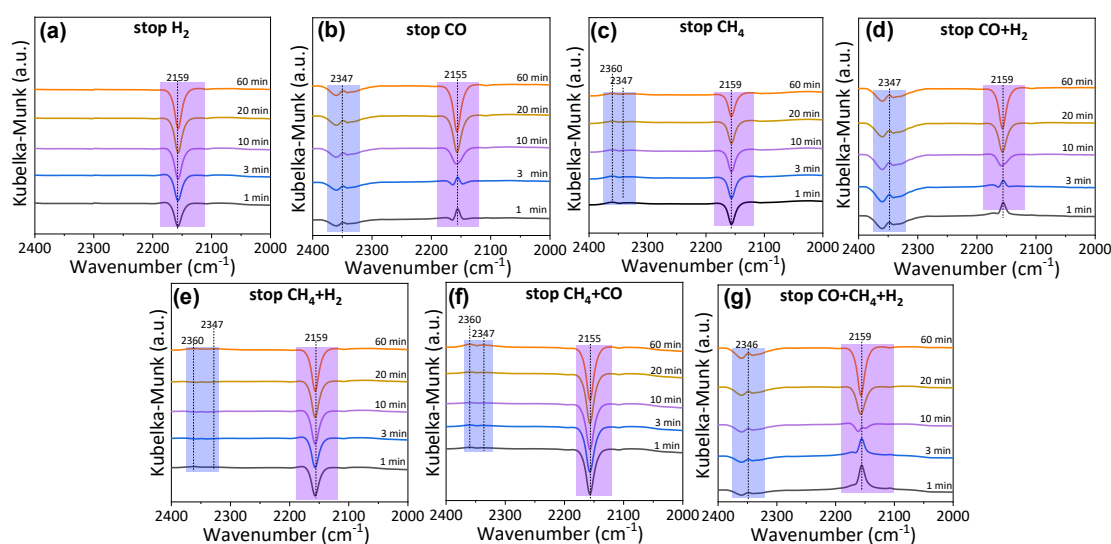

**Fig. S7.** *In situ* DRIFTS spectra of (a) stop H<sub>2</sub>, (b) stop CO, (c) stop CH<sub>4</sub>, (d) stop CO + H<sub>2</sub>, (e) stop CH<sub>4</sub> + H<sub>2</sub>, (f) stop CH<sub>4</sub> + CO and (g) stop CH<sub>4</sub> + CO + H<sub>2</sub> on Cu-ZSM-5 catalyst at 250 °C as a function of time.

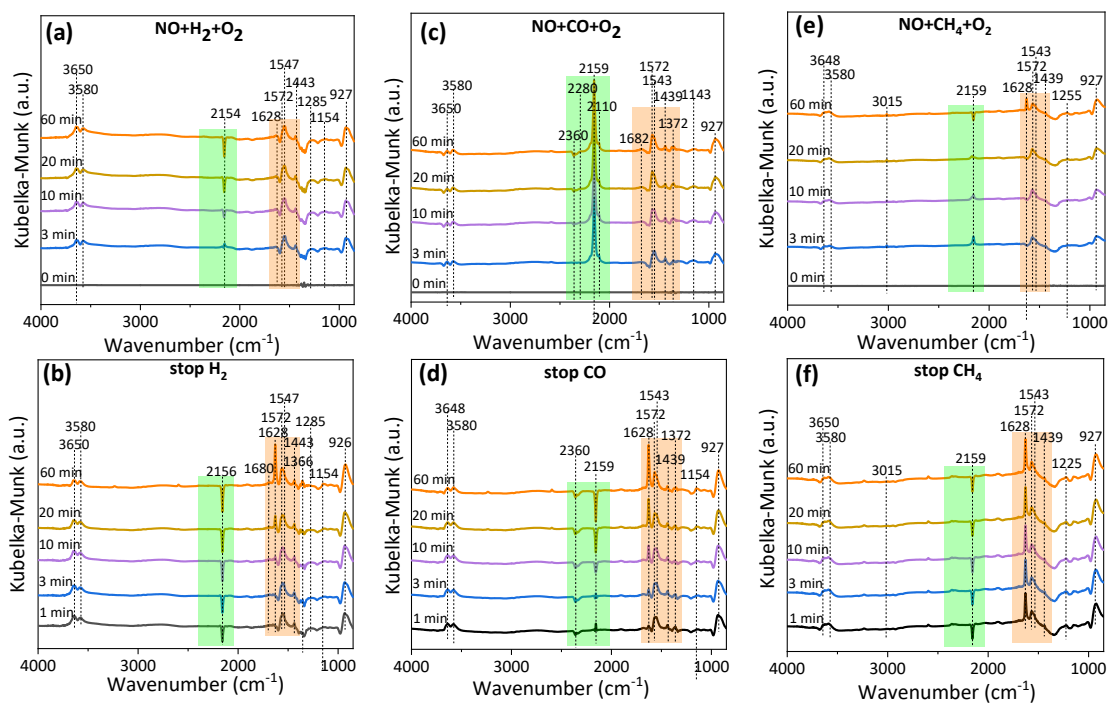

**Fig. S8.** *In situ* DRIFTS spectra of (a) NO + H<sub>2</sub> + O<sub>2</sub>, (b) stop H<sub>2</sub>, (c) NO + CO + O<sub>2</sub>, (d) stop CO, (e) NO + CH<sub>4</sub> + O<sub>2</sub> and (f) stop CH<sub>4</sub> on Cu-ZSM-5 catalyst at 250 °C as a function of time.



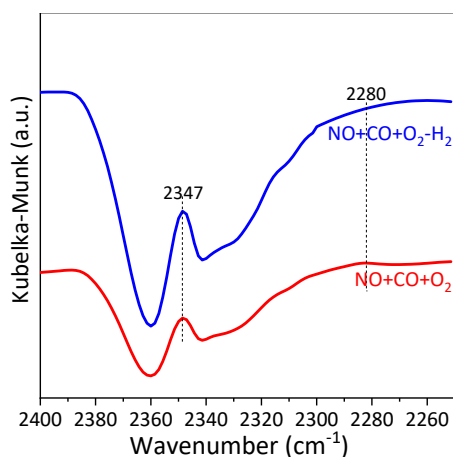

**Fig. S9.** *In situ* DRIFTS spectra on Cu-ZSM-5 catalyst at 250 °C under different reaction conditions.

In order to investigate the effect of H<sub>2</sub> on the generation of intermediate species in CO-SCR process, the catalyst first was exposed to the flow of NO + CO + O<sub>2</sub> for reaction, and then H<sub>2</sub> was introduced in the reaction. As shown in **Fig. S9**, when exposed the catalyst to NO + CO + O<sub>2</sub> reaction system, a band at 2280 cm<sup>-1</sup> was appeared in spectra, which could be ascribed to NCO species, which is an important intermediate species in CO-SCR reaction <sup>2</sup>. However, after introducing H<sub>2</sub> for reaction, the intensity of this band vanished, which means that addition of H<sub>2</sub> could reduce the amount of NCO species, thus the presence of H<sub>2</sub> may change the reaction route in CO-SCR process.

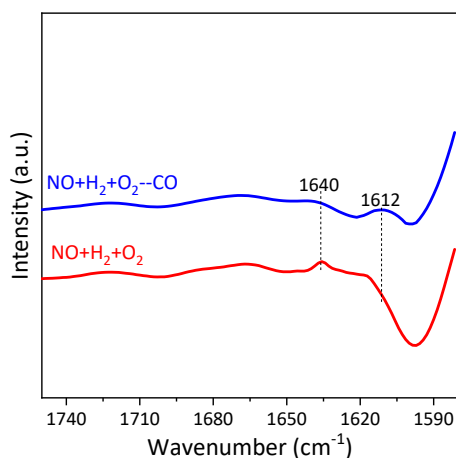

**Fig. S10.** *In situ* DRIFTS spectra on Cu-ZSM-5 catalyst at 350 °C under different reaction conditions.

To investigate the inhibitory effect of CO on the generation of  $\text{NH}_x$  species from  $\text{H}_2$ , the catalyst was first exposed to the flow of  $\text{NO} + \text{H}_2 + \text{O}_2$  for reaction, and then CO was added into the reaction. As shown in **Fig. S10**, a peak at  $1640 \text{ cm}^{-1}$  attributed to  $\text{NH}_4^+$  species appeared after introduction of  $\text{H}_2$ <sup>3</sup>, which indicated that  $\text{NH}_4^+$  species was formed in the SCR process. However, after injecting CO, the intensity of  $1640 \text{ cm}^{-1}$  weakened to almost disappear, indicating CO could have an obvious inhibition on the formation of  $\text{NH}_x$  species.

**Table S1.** Observed species in the reaction process as identified by IR.

| Wavenumber (cm <sup>-1</sup> ) | Species and mode                           | Ref.  |
|--------------------------------|--------------------------------------------|-------|
| 1143                           | Adsorbed NO                                | 4     |
| 1255                           | Bridged nitrates                           | 4     |
| 1439                           | Nitrites                                   | 5     |
| 2155                           | NO <sup>+</sup> species                    | 6     |
| 964                            | Bidentate carbonates                       | 7     |
| 1372                           | Monodentate carbonate                      | 8     |
| 2109/2155                      | Cu <sup>+</sup> (CO) carbonyl              | 9, 10 |
| 2195                           | Cu <sup>+</sup> (CO) <sub>2</sub> carbonyl | 11    |
| 2346/2360                      | Adsorbed CO <sub>2</sub>                   | 12    |
| 1285                           | Coordinated NH <sub>3</sub>                | 13    |
| 3015                           | Adsorbed CH <sub>4</sub>                   | 14    |
| 3580                           | Si-OH-Al                                   | 15    |
| 3650                           | Cu-OH                                      | 15    |

**Table S2.** Reaction steps of various SCR reactions.

| Reaction type                             | Reaction steps                                                                                                  | No.  |
|-------------------------------------------|-----------------------------------------------------------------------------------------------------------------|------|
| NO adsorption<br>and nitrate<br>formation | $\text{NO} + * \rightarrow \text{NO}^*$                                                                         | R1   |
|                                           | $\text{O}_2 + * \rightarrow \text{O}_2^*$                                                                       | R2   |
|                                           | $\text{NO}^* + * \rightarrow \text{N}^* + \text{O}^*$                                                           | R3   |
|                                           | $\text{O}_2^* + * \rightarrow \text{O}^* + \text{O}^*$                                                          | R4   |
|                                           | $\text{N}^* + \text{N}^* \rightarrow \text{N}_2 + 2^*$                                                          | R5   |
|                                           | $\text{NO}^* + \text{N}^* \rightarrow \text{N}_2\text{O} + 2^*$                                                 | R6   |
|                                           | $\text{NO}^* + \text{O}_2^* \rightarrow \text{NO}_2^* + \text{O}^*$                                             | R7   |
|                                           | $\text{NO}^* + \text{O}_2^{*-} \rightarrow \text{NO}_3^{*-} + *$                                                | R8   |
|                                           | $\text{N}_2\text{O}^* \rightarrow \text{N}_2 + \text{O}^*$                                                      | R9   |
| H <sub>2</sub> -SCR                       | $\text{H}_2 + * \rightarrow \text{H}_2^*$                                                                       | Ra1  |
|                                           | $\text{H}_2^* \rightarrow 2\text{H}^*$                                                                          | Ra2  |
|                                           | $\text{N}^* + \text{H}^* \rightarrow \text{NH}^* + *$                                                           | Ra3  |
|                                           | $\text{NH}^* + \text{H}^* \rightarrow \text{NH}_2^* + *$                                                        | Ra4  |
|                                           | $\text{NH}_2^* + \text{H}^* \rightarrow \text{NH}_3^* + *$                                                      | Ra5  |
|                                           | $\text{O}^* + \text{H}^* \rightarrow \text{OH}^* + *$                                                           | Ra6  |
|                                           | $\text{OH}^* + \text{H}^* \rightarrow \text{H}_2\text{O} + 2^*$                                                 | Ra7  |
|                                           | $\text{NO}_2^* + \text{H}_2^* \rightarrow \text{ONH}^* + \text{OH}^*$                                           | Ra8  |
|                                           | $\text{ONH}^* + \text{NO}^* + \text{H}^* \rightarrow \text{N}_2 + \text{H}_2\text{O} + \text{O}^* + 2^*$        | Ra9  |
|                                           | $\text{ONH}^* + \text{NO}^* + \text{H}^* \rightarrow \text{N}_2\text{O}^* + \text{H}_2\text{O} + 2^*$           | Ra10 |
|                                           | $4\text{NH}_3 + 4\text{NO} + 2\text{O}_2 \rightarrow 4\text{N}_2 + 6\text{H}_2\text{O}$                         | Ra11 |
|                                           | $2\text{NH}_3 + \text{NO} + \text{NO}_2 \rightarrow 2\text{N}_2 + 3\text{H}_2\text{O}$                          | Ra12 |
| CO-SCR                                    | $\text{CO} + * \rightarrow \text{CO}^*$                                                                         | Rb1  |
|                                           | $\text{N}^* + \text{CO}^* \rightarrow \text{NCO}^* + *$                                                         | Rb2  |
|                                           | $\text{NO}_2^* + \text{CO}^* \rightarrow \text{NCO}^* + \text{O}_2^*$                                           | Rb3  |
|                                           | $\text{CO}^* + 2\text{NO}_2^* \rightarrow \text{N}_2 + \text{CO}_2 + 3\text{O}^*$                               | Rb4  |
|                                           | $\text{NCO}^* + \text{NO}^* \rightarrow \text{N}_2 + \text{CO}_2 + 2^*$                                         | Rb5  |
|                                           | $\text{CO}^* + \text{O}^* \rightarrow \text{CO}_2 + 2^*$                                                        | Rb6  |
|                                           | $2\text{NCO}^* + 3\text{H}_2\text{O} \rightarrow 2\text{NH}_3 + 2\text{CO}_2 + \text{O}^*$                      | Rb7  |
|                                           | $\text{NCO}^* + \text{NO}_2^* \rightarrow \text{N}_2 + \text{CO}_2 + * + \text{O}^*$                            | Rb8  |
| CH <sub>4</sub> -SCR                      | $\text{CH}_4^* + \text{O}^* \rightarrow \text{CH}_3^* + \text{OH}^*$                                            | Rc1  |
|                                           | $\text{CH}_3^* + \text{O}^* \rightarrow \text{CH}_2^* + \text{OH}^*$                                            | Rc2  |
|                                           | $\text{NO}^* + \text{CH}_3^* \rightarrow \text{CH}_3\text{NO}^* + *$                                            | Rc3  |
|                                           | $4\text{CH}_3\text{NO} + 2\text{NO} + 4\text{O}_2 \rightarrow 3\text{N}_2 + 6\text{H}_2\text{O} + 4\text{CO}_2$ | Rc4  |
|                                           | $\text{CH}_4 + 2\text{O}_2 \rightarrow \text{CO}_2 + 2\text{H}_2\text{O}$                                       | Rc5  |
|                                           | $2\text{NO} + \text{CH}_4 + \text{O}_2 \rightarrow \text{N}_2 + \text{CO}_2 + 2\text{H}_2\text{O}$              | Rc6  |

## References

1. Database of Zeolite Structures, <http://www.iza-structure.org/databases/>).
2. Y. H. Yeom, B. Wen, W. M. H. Sachtler and E. Weitz, *The Journal of Physical Chemistry B*, 2004, **108**, 5386-5404.
3. D. Meng, W. Zhan, Y. Guo, Y. Guo, L. Wang and G. Lu, *ACS Catal.*, 2015, **5**, 5973-5983.
4. Q. Wang, H. Xu, W. Huang, Z. Pan and H. Zhou, *J. Hazard. Mater.*, 2019, **364**, 499-508.
5. S. Lai, D. Meng, W. Zhan, Y. Guo, Y. Guo, Z. Zhang and G. Lu, *RSC Adv.*, 2015, **5**, 90235-90244.
6. H.-Y. Chen, M. Kollar, Z. Wei, F. Gao, Y. Wang, J. Szanyi and C. H. F. Peden, *Catal. Today*, 2019, **320**, 61-71.
7. K. I. Hadjiivanov and G. N. Vayssilov, *Advances in Catalysis*, 2002, **47**, 307-511.
8. H. L. Huynh, J. Zhu, G. Zhang, Y. Shen, W. M. Tucho, Y. Ding and Z. Yu, *J. Catal.*, 2020, **392**, 266-277.
9. H. I. Hamoud, V. Valtchev and M. Daturi, *Appl. Catal. B: Environ.*, 2019, **250**, 419-428.
10. H. Zhou, Z. Huang, C. Sun, F. Qin, D. Xiong, W. Shen and H. Xu, *Appl. Catal. B: Environ.*, 2012, **125**, 492-498.
11. V. L. Sushkevich, D. Palagin, M. Ranocchiari and J. A. van Bokhoven, *Science*, 2017, **356**, 523.
12. S. M. Fehr and I. Krossing, *ChemCatChem*, 2020, **12**, 2622-2629.
13. G. Qi, R. Yang and F. Rinaldi, *J. Catal.*, 2006, **237**, 381-392.
14. Y. Shi, J. Pu, L. Gao and S. Shan, *Chem. Eng. J.*, 2021, **403**, 126394.
15. J. Song, Y. Wang, E. D. Walter, N. M. Washton, D. Mei, L. Kovarik, M. H. Engelhard, S. Proding, Y. Wang, C. H. F. Peden and F. Gao, *ACS Catal.*, 2017, **7**, 8214-8227.
