# Supplementary material for: Unraveling the interactions of reductants and reaction path over Cu-ZSM-5 for model coal-gas-SCRviaa transient reaction study
Source: Royal Society of Chemistry journal article supplement (doi:10.1039/d1cy01810h), 2021-12-15
Supplement: d1cy01810h2.pdf [file d1cy01810h2.pdf]

## Supporting information

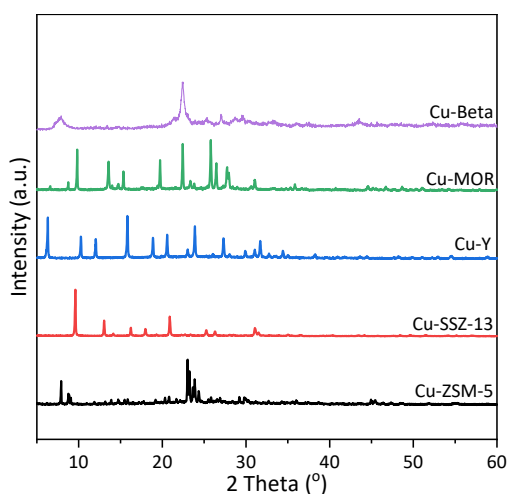

Fig. S1. XRD spectra of Cu based catalyst with different topology structure.

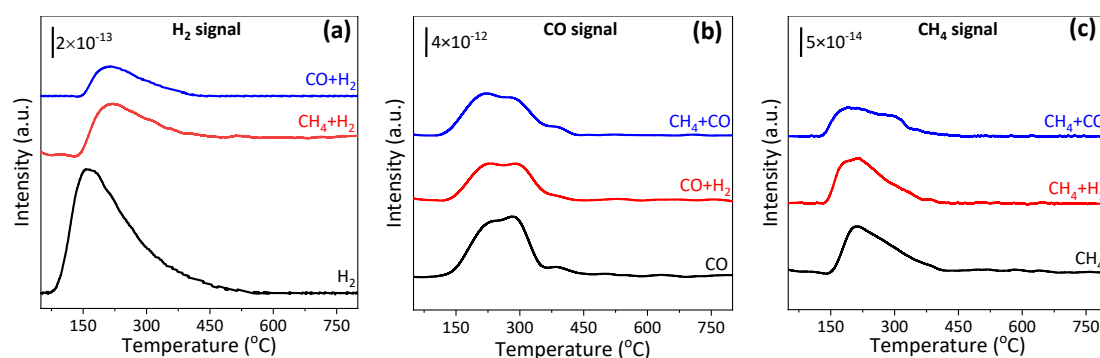

Fig. S2. H<sub>2</sub> signal (a), CO signal (b), CH<sub>4</sub> signal (c) of Cu-ZSM-5 catalyst at different adsorption conditions.

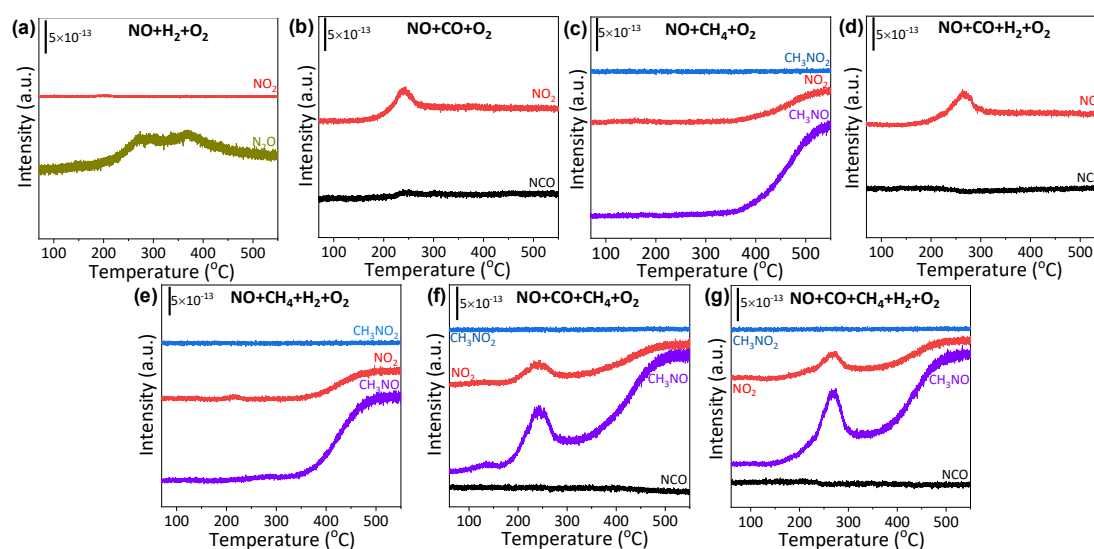

Fig. S3. MS signals of Cu-ZSM-5 catalyst at different reaction conditions.

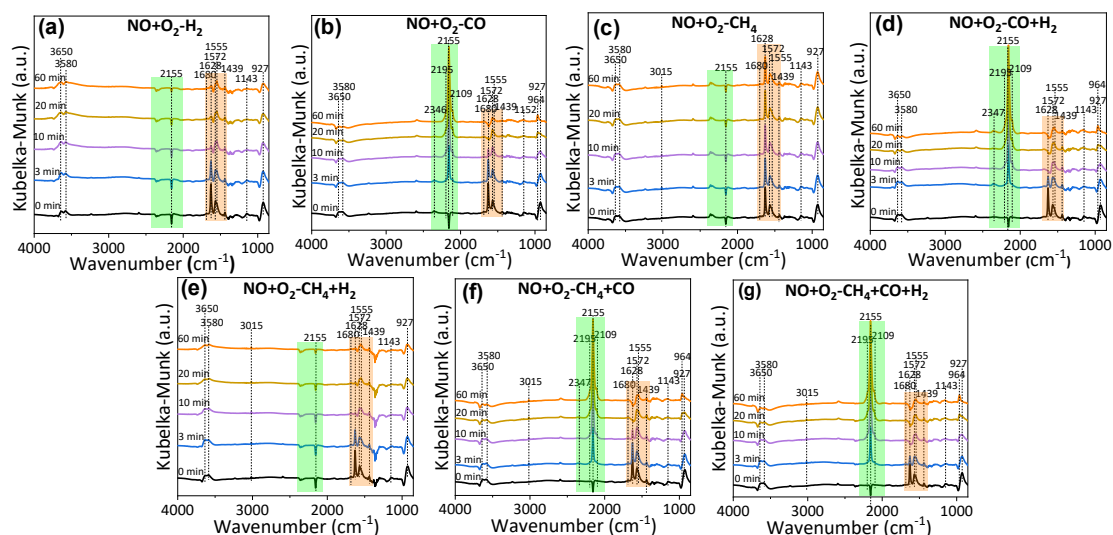

**Fig. S4.** *In situ* DRIFTS spectra of (a) H<sub>2</sub>, (b) CO, (c) CH<sub>4</sub>, (d) CO + H<sub>2</sub>, (e) CH<sub>4</sub> + H<sub>2</sub>, (f) CH<sub>4</sub> + CO, and (g) CH<sub>4</sub> + CO + H<sub>2</sub> reacted with pre-adsorbed NO + O<sub>2</sub> on Cu-ZSM-5 catalyst at 250 °C as a function of time.

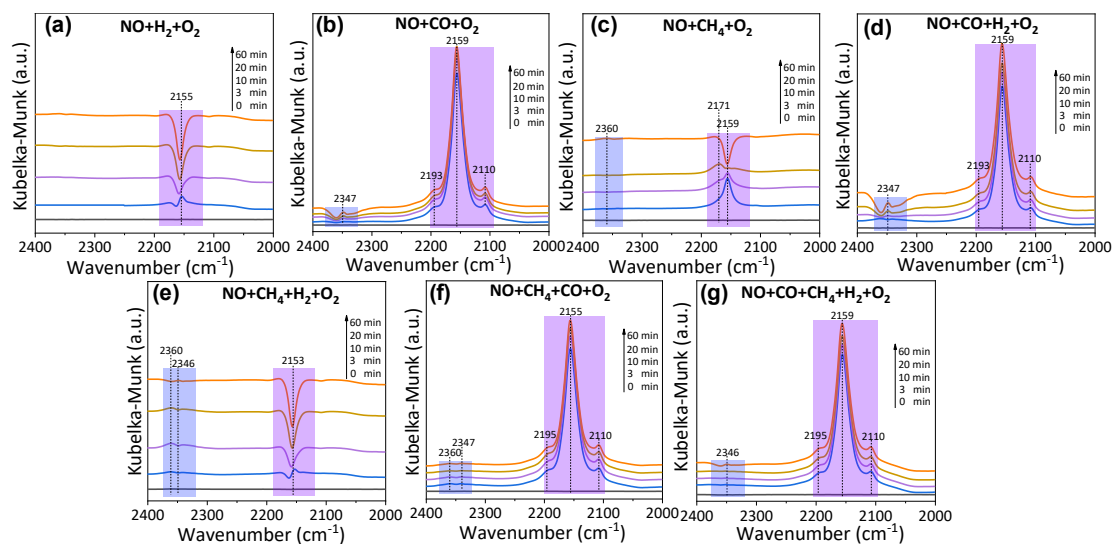

**Fig. S5.** *In situ* DRIFTS spectra of (a) NO + H<sub>2</sub> + O<sub>2</sub>, (b) NO + CO + O<sub>2</sub>, (c) NO + CH<sub>4</sub> + O<sub>2</sub>, (d) NO + CO + H<sub>2</sub> + O<sub>2</sub>, (e) NO + CH<sub>4</sub> + H<sub>2</sub> + O<sub>2</sub>, (f) NO + CH<sub>4</sub> + CO + O<sub>2</sub> and (g) NO + CH<sub>4</sub> + CO + H<sub>2</sub> + O<sub>2</sub> on Cu-ZSM-5 catalyst at 250 °C as a function of time.

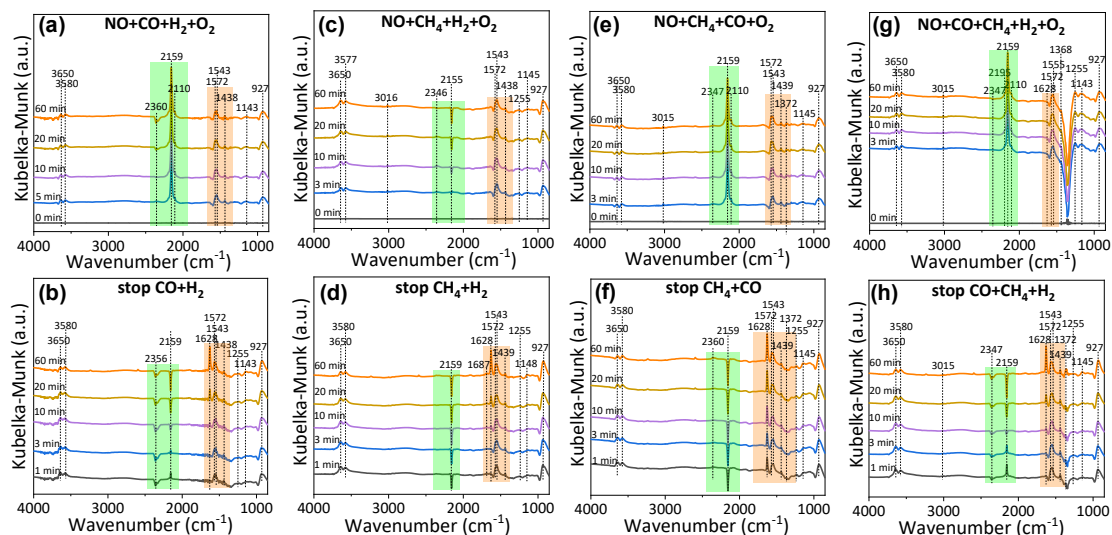

**Fig. S6.** *In situ* DRIFTS spectra of (a) NO + CO + H<sub>2</sub> + O<sub>2</sub>, (b) stop CO + H<sub>2</sub>, (c) NO + CH<sub>4</sub> + H<sub>2</sub> + O<sub>2</sub>, (d) stop CH<sub>4</sub> + H<sub>2</sub>, (e) NO + CH<sub>4</sub> + CO + O<sub>2</sub>, (f) stop CH<sub>4</sub> + CO (e) NO + CH<sub>4</sub> + CO + H<sub>2</sub> + O<sub>2</sub> and (f) stop CH<sub>4</sub> + CO + H<sub>2</sub> on Cu-ZSM-5 catalyst at 250 °C as a function of time.

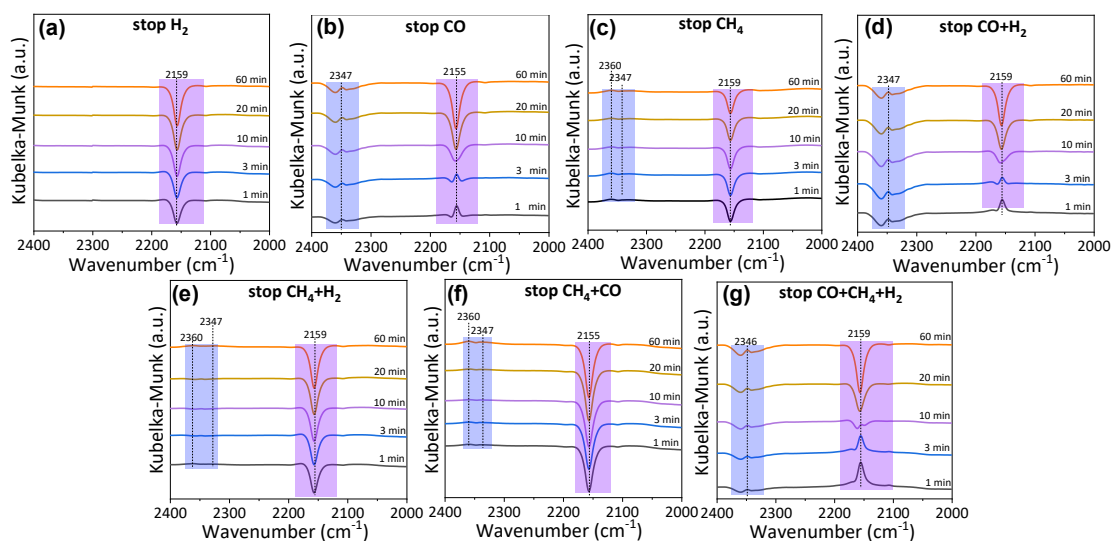

**Fig. S7.** *In situ* DRIFTS spectra of (a) stop H<sub>2</sub>, (b) stop CO, (c) stop CH<sub>4</sub>, (d) stop CO + H<sub>2</sub>, (e) stop CH<sub>4</sub> + H<sub>2</sub>, (f) stop CH<sub>4</sub> + CO and (g) stop CH<sub>4</sub> + CO + H<sub>2</sub> on Cu-ZSM-5 catalyst at 250 °C as a function of time.

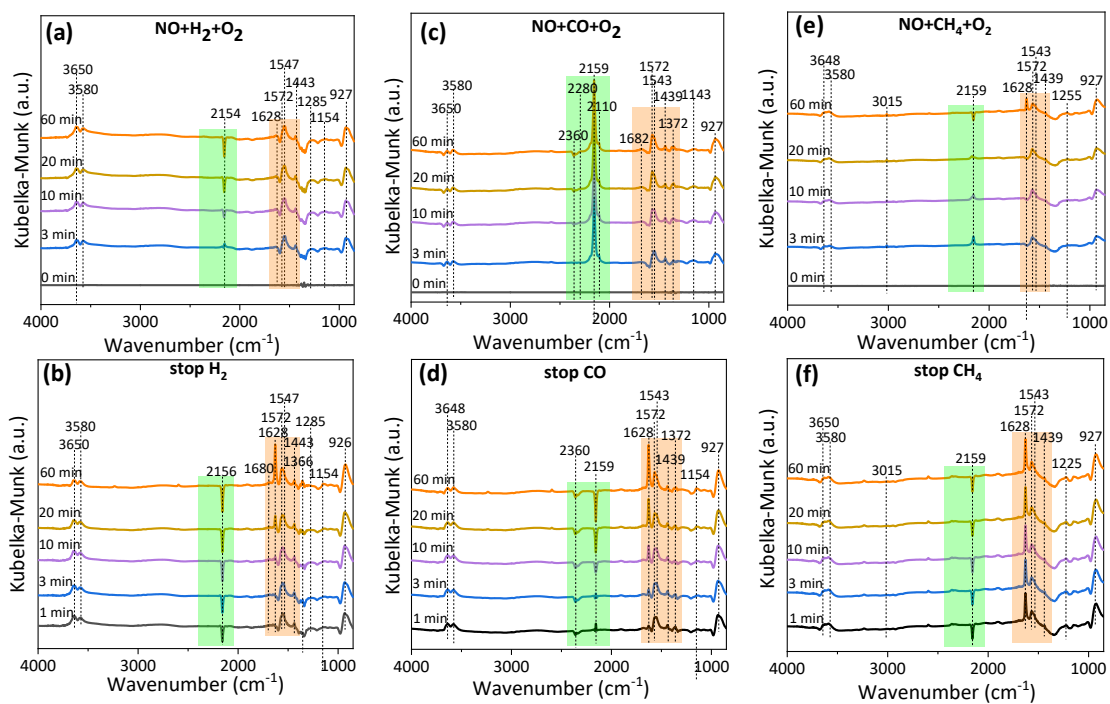

**Fig. S8.** *In situ* DRIFTS spectra of (a) NO + H<sub>2</sub> + O<sub>2</sub>, (b) stop H<sub>2</sub>, (c) NO + CO + O<sub>2</sub>, (d) stop CO, (e) NO + CH<sub>4</sub> + O<sub>2</sub> and (f) stop CH<sub>4</sub> on Cu-ZSM-5 catalyst at 250 °C as a function of time.

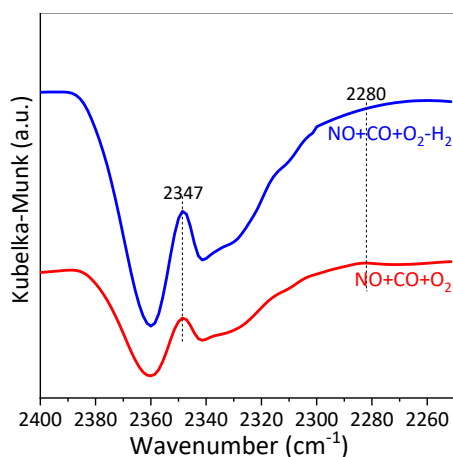

Fig. S9. *In situ* DRIFTS spectra on Cu-ZSM-5 catalyst at 250 °C under different reaction conditions.

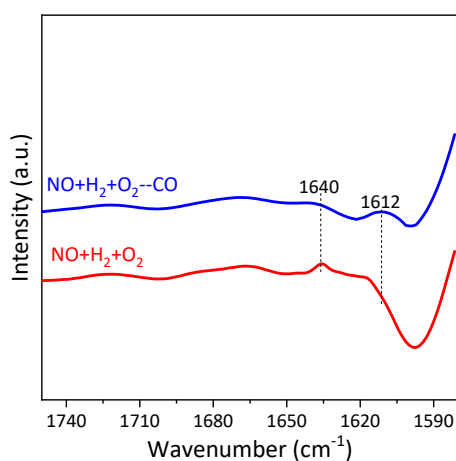

Fig. S10. *In situ* DRIFTS spectra on Cu-ZSM-5 catalyst at 350 °C under different reaction conditions.

**Table S1.** Observed species in the reaction process as identified by IR.

| Wavenumber (cm <sup>-1</sup> ) | Species and mode                           | Ref.  |
|--------------------------------|--------------------------------------------|-------|
| 1143                           | Adsorbed NO                                | 4     |
| 1255                           | Bridged nitrates                           | 4     |
| 1439                           | Nitrites                                   | 5     |
| 2155                           | NO <sup>+</sup> species                    | 6     |
| 964                            | Bidentate carbonates                       | 7     |
| 1372                           | Monodentate carbonate                      | 8     |
| 2109/2155                      | Cu <sup>+</sup> (CO) carbonyl              | 9, 10 |
| 2195                           | Cu <sup>+</sup> (CO) <sub>2</sub> carbonyl | 11    |
| 2346/2360                      | Adsorbed CO <sub>2</sub>                   | 12    |
| 1285                           | Coordinated NH <sub>3</sub>                | 13    |
| 3015                           | Adsorbed CH <sub>4</sub>                   | 14    |
| 3580                           | Si-OH-Al                                   | 15    |
| 3650                           | Cu-OH                                      | 15    |

**Table S2.** Reaction steps of various SCR reactions.

| Reaction type                                                                          | Reaction steps                                                                                                  | No.  |
|----------------------------------------------------------------------------------------|-----------------------------------------------------------------------------------------------------------------|------|
| NO adsorption<br>and nitrate<br>formation                                              | $\text{NO} + * \rightarrow \text{NO}^*$                                                                         | R1   |
|                                                                                        | $\text{O}_2 + * \rightarrow \text{O}_2^*$                                                                       | R2   |
|                                                                                        | $\text{NO}^* + * \rightarrow \text{N}^* + \text{O}^*$                                                           | R3   |
|                                                                                        | $\text{O}_2^* + * \rightarrow \text{O}^* + \text{O}^*$                                                          | R4   |
|                                                                                        | $\text{N}^* + \text{N}^* \rightarrow \text{N}_2 + 2^*$                                                          | R5   |
|                                                                                        | $\text{NO}^* + \text{N}^* \rightarrow \text{N}_2\text{O} + 2^*$                                                 | R6   |
|                                                                                        | $\text{NO}^* + \text{O}_2^* \rightarrow \text{NO}_2^* + \text{O}^*$                                             | R7   |
|                                                                                        | $\text{NO}^* + \text{O}_2^* \rightarrow \text{NO}_3^* + *$                                                      | R8   |
|                                                                                        | $\text{N}_2\text{O}^* \rightarrow \text{N}_2 + \text{O}^*$                                                      | R9   |
| H <sub>2</sub> -SCR                                                                    | $\text{H}_2 + * \rightarrow \text{H}_2^*$                                                                       | Ra1  |
|                                                                                        | $\text{H}_2^* \rightarrow 2\text{H}^*$                                                                          | Ra2  |
|                                                                                        | $\text{N}^* + \text{H}^* \rightarrow \text{NH}^* + *$                                                           | Ra3  |
|                                                                                        | $\text{NH}^* + \text{H}^* \rightarrow \text{NH}_2^* + *$                                                        | Ra4  |
|                                                                                        | $\text{NH}_2^* + \text{H}^* \rightarrow \text{NH}_3^* + *$                                                      | Ra5  |
|                                                                                        | $\text{O}^* + \text{H}^* \rightarrow \text{OH}^* + *$                                                           | Ra6  |
|                                                                                        | $\text{OH}^* + \text{H}^* \rightarrow \text{H}_2\text{O} + 2^*$                                                 | Ra7  |
|                                                                                        | $\text{NO}_2^* + \text{H}_2^* \rightarrow \text{ONH}^* + \text{OH}^*$                                           | Ra8  |
|                                                                                        | $\text{ONH}^* + \text{NO}^* + \text{H}^* \rightarrow \text{N}_2 + \text{H}_2\text{O} + \text{O}^* + 2^*$        | Ra9  |
|                                                                                        | $\text{ONH}^* + \text{NO}^* + \text{H}^* \rightarrow \text{N}_2\text{O}^* + \text{H}_2\text{O} + 2^*$           | Ra10 |
|                                                                                        | $4\text{NH}_3 + 4\text{NO} + 2\text{O}_2 \rightarrow 4\text{N}_2 + 6\text{H}_2\text{O}$                         | Ra11 |
| $2\text{NH}_3 + \text{NO} + \text{NO}_2 \rightarrow 2\text{N}_2 + 3\text{H}_2\text{O}$ | Ra12                                                                                                            |      |
| CO-SCR                                                                                 | $\text{CO} + * \rightarrow \text{CO}^*$                                                                         | Rb1  |
|                                                                                        | $\text{N}^* + \text{CO}^* \rightarrow \text{NCO}^* + *$                                                         | Rb2  |
|                                                                                        | $\text{NO}_2^* + \text{CO}^* \rightarrow \text{NCO}^* + \text{O}_2^*$                                           | Rb3  |
|                                                                                        | $\text{CO}^* + 2\text{NO}_2^* \rightarrow \text{N}_2 + \text{CO}_2 + 3\text{O}^*$                               | Rb4  |
|                                                                                        | $\text{NCO}^* + \text{NO}^* \rightarrow \text{N}_2 + \text{CO}_2 + 2^*$                                         | Rb5  |
|                                                                                        | $\text{CO}^* + \text{O}^* \rightarrow \text{CO}_2 + 2^*$                                                        | Rb6  |
|                                                                                        | $2\text{NCO}^* + 3\text{H}_2\text{O} \rightarrow 2\text{NH}_3 + 2\text{CO}_2 + \text{O}^*$                      | Rb7  |
|                                                                                        | $\text{NCO}^* + \text{NO}_2^* \rightarrow \text{N}_2 + \text{CO}_2 + * + \text{O}^*$                            | Rb8  |
| CH <sub>4</sub> -SCR                                                                   | $\text{CH}_4^* + \text{O}^* \rightarrow \text{CH}_3^* + \text{OH}^*$                                            | Rc1  |
|                                                                                        | $\text{CH}_3^* + \text{O}^* \rightarrow \text{CH}_2^* + \text{OH}^*$                                            | Rc2  |
|                                                                                        | $\text{NO}^* + \text{CH}_3^* \rightarrow \text{CH}_3\text{NO}^* + *$                                            | Rc3  |
|                                                                                        | $4\text{CH}_3\text{NO} + 2\text{NO} + 4\text{O}_2 \rightarrow 3\text{N}_2 + 6\text{H}_2\text{O} + 4\text{CO}_2$ | Rc4  |
|                                                                                        | $\text{CH}_4 + 2\text{O}_2 \rightarrow \text{CO}_2 + 2\text{H}_2\text{O}$                                       | Rc5  |
|                                                                                        | $2\text{NO} + \text{CH}_4 + \text{O}_2 \rightarrow \text{N}_2 + \text{CO}_2 + 2\text{H}_2\text{O}$              | Rc6  |
